# Supplementary material for: Low-temperature molten salt synthesis of MoS2@CoS2 heterostructures for efficient hydrogen evolution reaction
Source: Royal Society of Chemistry journal article supplement (doi:10.1039/d0cc01726d), 2020-01-01
Supplement: d0cc01726d1.pdf [file d0cc01726d1.pdf]

**Electronic Supplementary Information**

**Low-temperature molten salt synthesis of MoS<sub>2</sub>@CoS<sub>2</sub> heterostructures for efficient hydrogen evolution reaction**

Song He,<sup>a</sup> Hongfang Du,<sup>\*a</sup> Ke Wang,<sup>a</sup> Qianchi Liu,<sup>a</sup> Jinmeng Sun,<sup>a</sup> Yuhang Liu,<sup>a</sup> Zhuzhu Du,<sup>a</sup>  
Linghai Xie,<sup>a,c</sup> Wei Ai,<sup>\*a</sup> and Wei Huang<sup>\*a,b,c</sup>

<sup>a</sup>*Institute of Flexible Electronics (IFE), Northwestern Polytechnical University (NPU), 127 West Youyi Road, Xi'an 710072, China*

<sup>b</sup>*Key Laboratory of Flexible Electronics (KLOFE) & Institute of Advanced Materials (IAM), Jiangsu National Synergetic Innovation Center for Advanced Materials (SICAM), Nanjing Tech University (NanjingTech), 30 South Puzhu Road, Nanjing 211816, China*

<sup>c</sup>*Key Laboratory for Organic Electronics & Information Displays (KLOEID) and Institute of Advanced Materials (IAM), SICAM, Nanjing University of Posts & Telecommunications, Nanjing 210023, Jiangsu, China*

<sup>\*</sup>Correspondence authors. Email: iamhfd@nwpu.edu.cn, iamwai@nwpu.edu.cn, iamwhuang@nwpu.edu.cn

# 1 Experimental Section

## 1.1 Chemicals

Cobalt nitrate hexahydrate ( $\text{Co}(\text{NO}_3)_2 \cdot 6\text{H}_2\text{O}$ , 99%, Adamas-beta), ammonium molybdate ( $(\text{NH}_4)_6\text{Mo}_7\text{O}_{24} \cdot 4\text{H}_2\text{O}$ , 99%, Adamas-beta), potassium thiocyanate (KSCN, 97.18%, Hushi) were bought from Tansoole. Nafion (5 wt.% in lower aliphatic alcohols and water mixture) was purchased from Sigma-Aldrich. All chemicals were used as received without further purification.

## 1.2 Synthesis of $\text{MoS}_2@\text{CoS}_2$ , $\text{MoS}_2$ , and $\text{CoS}_2$

For the synthesis of  $\text{MoS}_2@\text{CoS}_2$  heterostructures, 0.1 g  $(\text{NH}_4)_6\text{Mo}_7\text{O}_{24} \cdot 4\text{H}_2\text{O}$ , 0.8 g  $\text{Co}(\text{NO}_3)_2 \cdot 6\text{H}_2\text{O}$ , and 20 g KSCN were mixed together, the molar ratio of Mo to Co was about 0.2. Next, the mixture was loaded to a beaker and heated to 300 °C in a muffle furnace for 2 h. A black and dense solid solution was obtained at the end of the reaction. The product was collected by dissolving the excessive KSCN with DI water, and washed with DI water and ethanol for several times. Finally, the  $\text{MoS}_2@\text{CoS}_2$  powder was dried in a vacuum oven at 80 °C for 12 h.  $\text{MoS}_2$  and  $\text{CoS}_2$  were also synthesized under similar experimental procedures with  $(\text{NH}_4)_6\text{Mo}_7\text{O}_{24} \cdot 4\text{H}_2\text{O}$  and  $\text{Co}(\text{NO}_3)_2 \cdot 6\text{H}_2\text{O}$  as the precursor, respectively.

## 1.3 Synthesis of $\text{FeS}_2$ , $\text{NiS}_2$ , and $\text{SnS}_2$

For the synthesis of  $\text{FeS}_2$ ,  $\text{NiS}_2$  and  $\text{SnS}_2$ , an equimolar amount of  $\text{Fe}(\text{NO}_3)_3 \cdot 9\text{H}_2\text{O}$ ,  $\text{NiSO}_4$ , and  $\text{SnCl}_2$  was used as the transition metal precursors, respectively. While the detail experimental procedures were similar to the preparation of  $\text{MoS}_2@\text{CoS}_2$ .

## 1.4 Characterizations

X-ray diffraction (XRD) data were recorded on an X-ray diffractometer (Bruker D8 ADVANCE) with Cu K $\alpha$  radiation ( $\lambda = 1.5406 \text{ \AA}$ ). Scanning electron microscopy (SEM) and EDS measurements were carried out with a scanning electron microscope (FEI Verios G4). Transmission electron microscopy (TEM) analysis was performed on a transmission electron microscope (FEI Talos F200X TEM). X-ray photoelectron spectroscopy (XPS) data were recorded with a Thermo Escalab 250Xi instrument (Thermo Fisher).

## 1.5 Electrochemical measurements

All electrochemical measurements were conducted with a CHI 760E potentiostat in a conventional three electrode setup, in which a graphite rod was served as counter electrode, a saturated calomel electrode (SCE) equipped with a salt bridge was applied as reference electrode, a glass carbon electrode (GCE,  $\Phi = 4.0 \text{ mm}$ ) was used as working electrode, and 0.5 M H $_2$ SO $_4$  solution was used as electrolyte. For the preparation of catalyst ink, 10.0 mg catalyst and 2.0 mg carbon black were dispersed in 500  $\mu$ L ethanol containing 25  $\mu$ L Nafion (5 wt%), followed by treating in an ultrasonic bath for 15 minutes to get a homogeneous mixture. After then, 6.28  $\mu$ L of the ink was transferred to a newly polished GCE and dried at room temperature. The loading of the active material was determined to be 1.0 mg cm $^{-2}$ . Linear sweep voltammetry (LSV) curves were recorded at a scan rate of 5.0 mV s $^{-1}$ . The electrochemical impedance spectroscopy (EIS) tests were conducted in a frequency range of 0.1-100K Hz with an AC amplitude of 5.0 mV under a static HER overpotential of 200 mV.

Stability probed via cyclic voltammetry (CV) cycles was conducted in a potential range of -0.15 ~ 0.1 V at a scan rate of 100 mV s<sup>-1</sup>. All the potentials were converted to the reversible hydrogen electrode (RHE) via the Nernst equation:  $E_{\text{RHE}} = E_{\text{SCE}} + 0.242 + 0.059\text{pH}$  (V).<sup>1, 2</sup> All the electrochemical data were *i*R corrected according to the series resistance measured in EIS measurements.<sup>3</sup>

## 1.6 Theoretical calculations

All static calculations were carried out using spin-polarized density functional theory (DFT) with generalized gradient approximation (GGA) of Perdew-Burke-Ernzerhof (PBE) as implemented in VASP 5.4.4 code.<sup>4, 5</sup> The cutoff energy of plane-wave basis set was 400 eV and single gamma-point grid sampling was used for Brillouin zone integration. Atomic positions and cell parameters were optimized by conjugate gradient algorithm until the forces were less than 0.01 eV/Å. The hydrogen adsorption free energies were determined in the same way as in previous studies, which was estimated to be about 0.24 eV for ZPE, entropy and enthalpy correction.<sup>6</sup> The horizontal lattice parameters of single layer MoS<sub>2</sub> was optimized with 5 Mo atoms × 6 Mo atoms in size (ICSD-84180).<sup>7</sup> CoS<sub>2</sub>(001)-p(3×3) slab model was adopted to model CoS<sub>2</sub> substrate with bottom S-Co-S layer was fixed. The lattice parameters of CoS<sub>2</sub> and heterojunction were kept as reported experimental results (ICSD-86351).<sup>8</sup> Periodic boundary conditions were used in all directions and at least 12 Å of vacuum was used in the z-direction to separate the slabs.

## 2 Supporting figures

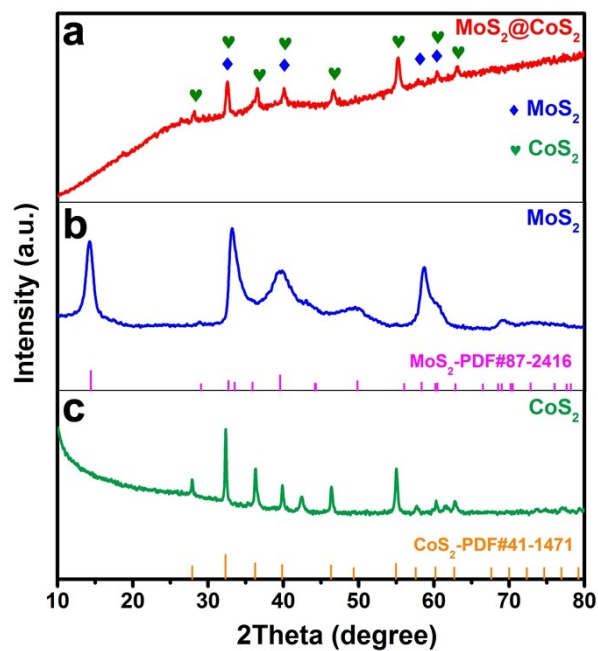

Fig. S1 XRD patterns of (a)  $\text{MoS}_2@\text{CoS}_2$ , (b)  $\text{MoS}_2$ , and (c)  $\text{CoS}_2$ .

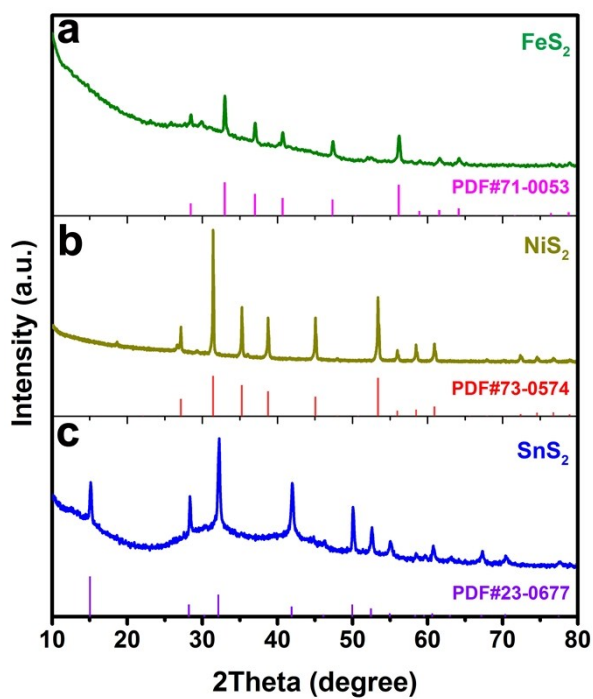

Fig. S2 XRD patterns of (a)  $\text{FeS}_2$ , (b)  $\text{NiS}_2$ , and (c)  $\text{SnS}_2$ .



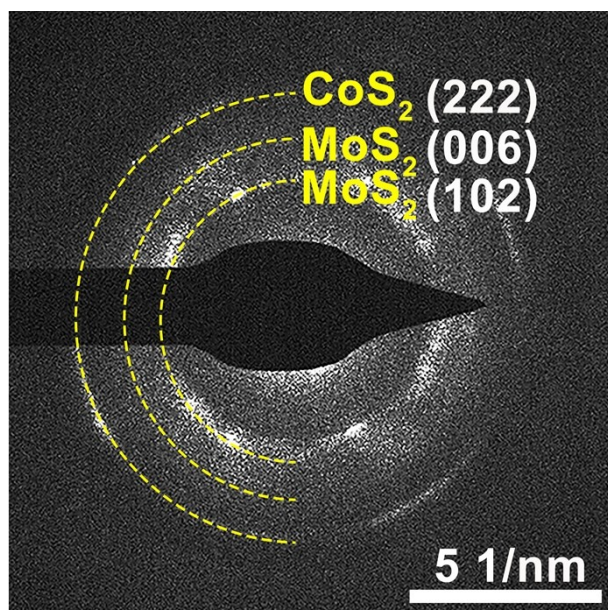

Fig. S3 SAED pattern of MoS<sub>2</sub>@CoS<sub>2</sub>.

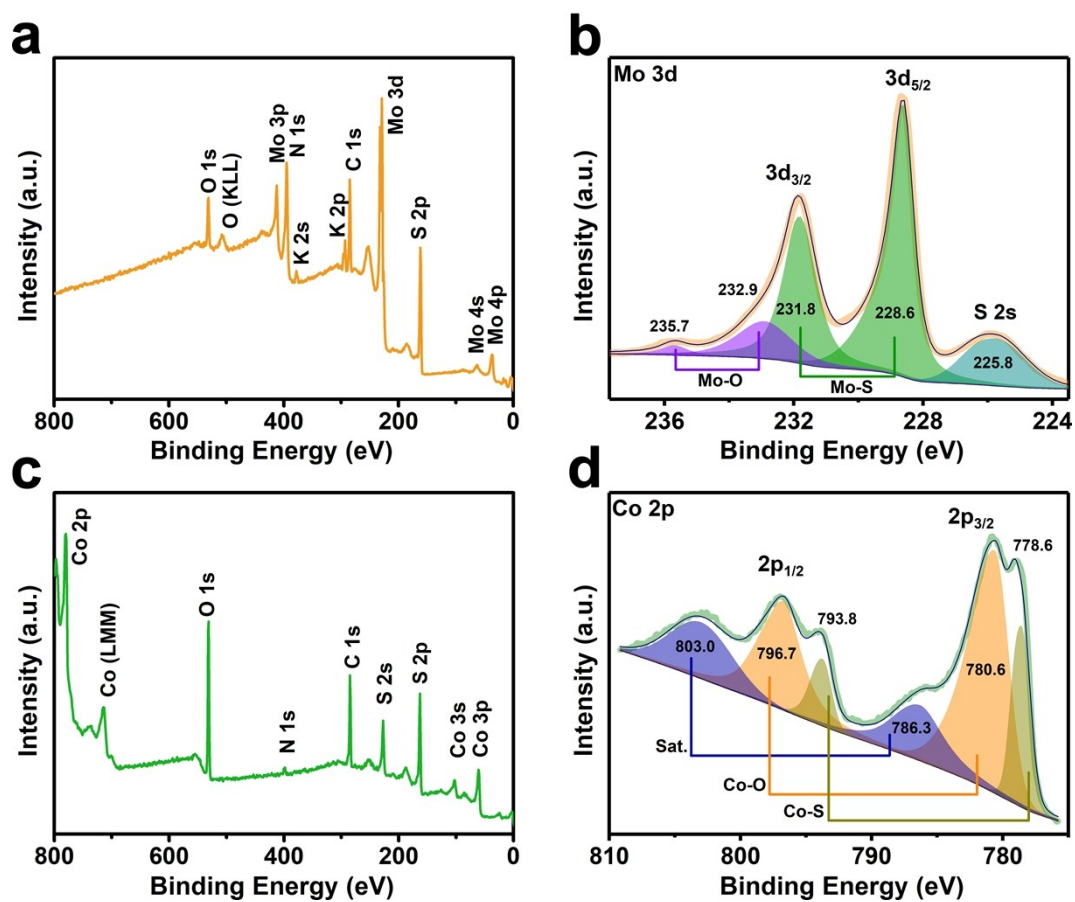

Fig. S4 (a) XPS survey and (b) Mo 3d spectra of MoS<sub>2</sub>; (c) XPS survey and (d) Co 2p spectra of CoS<sub>2</sub>.





**Table S1** Chemical composition of MoS<sub>2</sub>@CoS<sub>2</sub>, MoS<sub>2</sub> and CoS<sub>2</sub> based on XPS results.

| Contents<br>Catalysts              | S<br>(Wt. %) | Mo<br>(Wt. %) | Co<br>(Wt. %) | S<br>(At. %) | Mo<br>(At. %) | Co<br>(At. %) | Mo <sub>(At. %)</sub> /<br>Co <sub>(At. %)</sub> |
|------------------------------------|--------------|---------------|---------------|--------------|---------------|---------------|--------------------------------------------------|
| MoS <sub>2</sub> @CoS <sub>2</sub> | 47.72        | 24.93         | 27.35         | 67.32        | 11.73         | 20.95         | 0.6                                              |
| MoS <sub>2</sub>                   | 38.31        | 61.69         |               | 65.06        | 34.94         |               |                                                  |
| CoS <sub>2</sub>                   | 53.30        |               | 46.70         | 67.76        |               | 32.24         |                                                  |

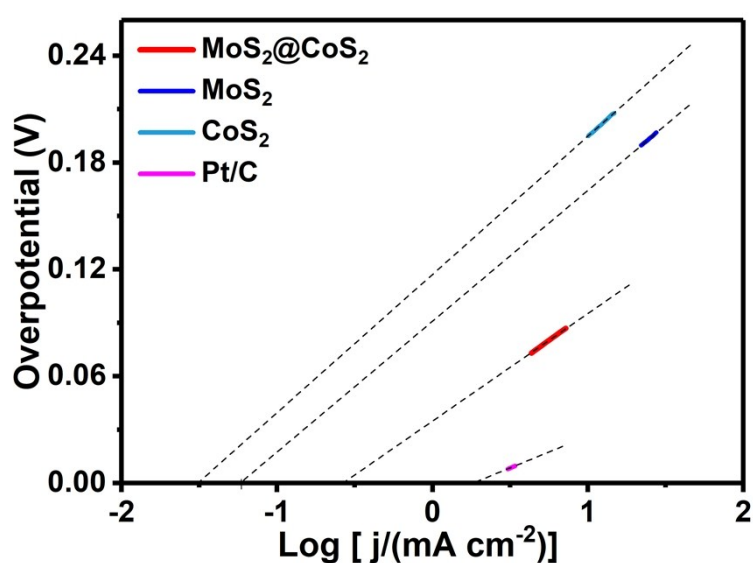

**Fig. S5** Estimation of exchange current densities.

The exchange current density ( $i_0$ ) is calculated via the extrapolation of corresponding Tafel plot. When the overpotential is 0, as revealed in Fig. S5, the  $\log(j)$  values for MoS<sub>2</sub>@CoS<sub>2</sub>, MoS<sub>2</sub>, CoS<sub>2</sub>, and Pt/C are determined to be -0.55, -1.22, -1.5, and 0.28, respectively. Accordingly, the  $i_0$  is calculated to be 0.28 mA cm<sup>-2</sup> for MoS<sub>2</sub>@CoS<sub>2</sub>,  $6.08 \times 10^{-2}$  mA cm<sup>-2</sup> for MoS<sub>2</sub>,  $3.16 \times 10^{-2}$  mA cm<sup>-2</sup> for CoS<sub>2</sub>, and 1.91 mA cm<sup>-2</sup> for Pt/C.

**Table S2** Catalytic performance comparison of MoS<sub>2</sub>@CoS<sub>2</sub> with the recently reported MoS<sub>2</sub>- and CoS<sub>2</sub>-based HER catalysts.

| Catalysts                                                                            | $\eta_{10}$ | Tafel<br>(mV dec <sup>-1</sup> ) | Reference                                                     |
|--------------------------------------------------------------------------------------|-------------|----------------------------------|---------------------------------------------------------------|
| Co <sub>9</sub> S <sub>8</sub> /MoS <sub>2</sub> /Ni <sub>3</sub> S <sub>2</sub> -NF | 103         | 55                               | <i>J. Am. Chem. Soc.</i> , 2019, <b>141</b> , 10417.          |
| MoS-CoS                                                                              | 134         | 60                               | <i>Adv. Sci.</i> , 2019, <b>6</b> , 1900140.                  |
| MoS <sub>2</sub> /CoS <sub>2</sub> NT                                                | 90          | 30                               | <i>J. Mater. Chem. A</i> , 2019, <b>7</b> , 13339             |
| CoS <sub>2</sub> -C@MoS <sub>2</sub>                                                 | 173         | 61                               | <i>ACS Sustainable Chem. Eng.</i> , 2019, <b>7</b> , 2899.    |
| S-MoS <sub>2</sub> @C                                                                | 136         | 78                               | <i>Adv. Energy Mater.</i> , 2019, <b>9</b> , 1802553.         |
| Co <sub>9</sub> S <sub>8</sub> @MoS <sub>2</sub>                                     | 171         | 123                              | <i>ACS Appl. Mater. Interfaces</i> , 2018, <b>10</b> , 1678.  |
| CoS <sub>x</sub> @MoS <sub>2</sub>                                                   | 239         | 103                              | <i>ACS Sustainable Chem. Eng.</i> , 2018, <b>6</b> , 12961    |
| MoS <sub>2</sub> @NSCS                                                               | 158         | 82                               | <i>Appl. Catal., B</i> , 2020, <b>263</b> , 118352.           |
| NPC@MoS <sub>2</sub>                                                                 | 178         | 58                               | <i>Catal. Today</i> , 2019, <b>330</b> , 259.                 |
| MoS <sub>2</sub> /CoNi <sub>2</sub> S <sub>4</sub>                                   | 81          | 67                               | <i>Adv. Funct. Mater.</i> , 2019, 1908520.                    |
| 0.75-Sv-MoS <sub>2</sub>                                                             | 194         | 78                               | <i>Angew. Chem.</i> , 2019, <b>131</b> , 2051.                |
| EA-2H/1T/rGO                                                                         | 186         | 49                               | <i>Small</i> , 2019, <b>15</b> , 1804903.                     |
| N-MoS <sub>2</sub> /CN                                                               | 114         | 46.8                             | <i>J. Am. Chem. Soc.</i> , 2019, <b>141</b> , 18578.          |
| Ag <sub>2</sub> S/MoS <sub>2</sub> /rGO                                              | 190         | 56                               | <i>ACS Appl. Mater. Interfaces</i> , 2019, <b>11</b> , 22380. |
| 1D-DRHA MoS <sub>2</sub>                                                             | 119         | 50.7                             | <i>Appl. Catal., B</i> , 2019, <b>258</b> , 117964.           |
| Hexagonal MoS <sub>2</sub> flakes                                                    | 105         | 53                               | <i>J. Mater. Chem. A</i> , 2019, <b>7</b> , 27603.            |
| MoS <sub>2</sub> nanoscroll                                                          | 153         | 73                               | <i>ACS Energy Lett.</i> , 2019, <b>4</b> , 2830.              |
| V-doped MoS <sub>2</sub>                                                             | 194         | 59                               | <i>Appl. Catal., B</i> , 2019, <b>254</b> , 432.              |
| 3D-Co-MoS <sub>2</sub> /G                                                            | 143         | 71                               | <i>Nano Energy</i> , 2019, <b>61</b> , 611.                   |
| 1T-MoS <sub>2</sub> /CC                                                              | 151         | 55                               | <i>Appl. Catal., B</i> , 2019, <b>246</b> , 296.              |
| Fractal-shaped MoS <sub>2</sub>                                                      | 185         | 45                               | <i>Nano Energy</i> , 2018, <b>51</b> , 786.                   |
| MoS <sub>2</sub> ML                                                                  | 126         | 72                               | <i>Adv. Energy Mater.</i> , 2018, <b>8</b> , 1800734.         |
| Ni <sub>5A</sub> -MoS <sub>2</sub> /CC                                               | 110         | 74                               | <i>Nano Energy</i> , 2018, <b>53</b> , 458.                   |
| MCM@MoS <sub>2</sub> -Ni                                                             | 161         | 81                               | <i>Adv. Funct. Mater.</i> , 2018, <b>28</b> , 1807086.        |
| NPNi-MoS <sub>2</sub> /rGO                                                           | 205         | 71                               | <i>ACS Catal.</i> , 2018, <b>8</b> , 8107.                    |
| Cu <sub>2-x</sub> S-MoS <sub>2</sub>                                                 | 320         | 60                               | <i>Chem. Mater.</i> , 2018, <b>30</b> , 4489.                 |
| Mo <sub>0.5</sub> W <sub>0.5</sub> S <sub>2</sub>                                    | 138         | 55                               | <i>ACS Catal.</i> , 2018, <b>8</b> , 9529.                    |
| MoS <sub>2</sub> (11.1% S vacancy)                                                   | 520         | 155                              | <i>J. Am. Chem. Soc.</i> , 2018, <b>140</b> , 16773.          |
| MoS <sub>2</sub> -GNR                                                                | 205         | 50                               | <i>Adv. Funct. Mater.</i> , 2018, <b>28</b> , 1802744.        |
| MoS <sub>2</sub> -MoP/C                                                              | 136         | 58                               | <i>J. Mater. Chem. A</i> , 2018, <b>6</b> , 616.              |
| Co-SMoS <sub>2</sub>                                                                 | 220         | 92                               | <i>Chem. Sci.</i> , 2018, <b>9</b> , 4769.                    |
| (1T/2H) MoS <sub>2</sub> /α-MoO <sub>3</sub>                                         | 232         | 81                               | <i>J. Mater. Chem. A</i> , 2018, <b>6</b> , 15320             |
| MoS <sub>2</sub> /rGO                                                                | 154         | 77                               | <i>Chem. Commun.</i> , 2019, <b>55</b> , 2078.                |
| MoS <sub>2</sub> /MoP/NC                                                             | 161         | 58                               | <i>J. Mater. Chem. A</i> , 2018, <b>6</b> , 24783.            |
| MoS <sub>2</sub> /CNT-2                                                              | 194         | 53                               | <i>Nanoscale</i> , 2020, <b>12</b> , 1109.                    |
| MoS <sub>2</sub> @CoS <sub>2</sub> -20%                                              | 96          | 60                               | This work                                                     |

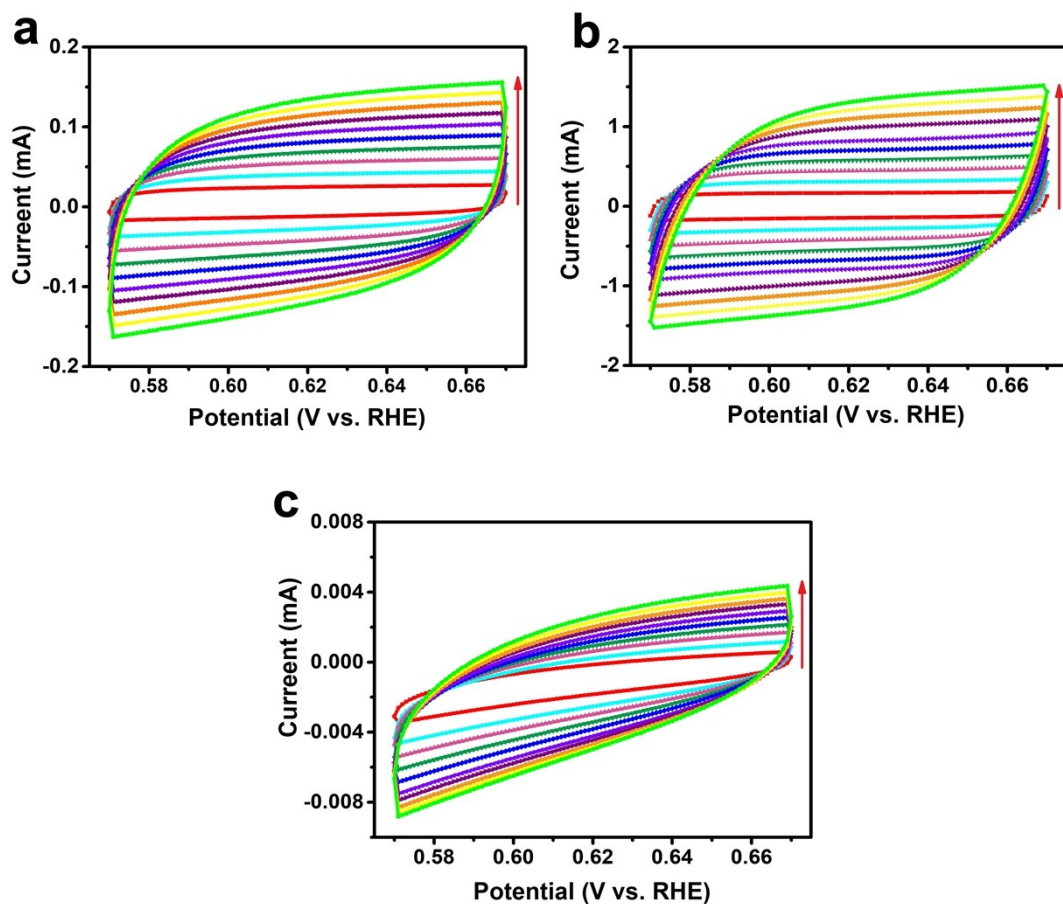

**Fig. S6** CV curves of (a) MoS<sub>2</sub>@CoS<sub>2</sub>, (b) MoS<sub>2</sub>, and (c) CoS<sub>2</sub> acquired at scan rates of 0.02, 0.04, 0.06, 0.08, 0.10, 0.12, 0.14, 0.16, 0.18, and 0.20 V s<sup>-1</sup>.

The electrochemical active surface area (ECSA) is measured via a double layer capacitance ( $C_{dl}$ ) method.<sup>9, 10</sup> In the non-Faradaic potential region, the measured current in CV is attributed to double-layer charging current ( $i$ ), which is equal to the product of scan rate ( $\nu$ ) and double layer capacitance ( $C_{dl}$ ), as expressed by equation (1):

$$i = \nu C_{dl} \quad (1)$$

Thus, a plot of a series  $i$  as a function of  $\nu$  yields a straight line whose slope is  $C_{dl}$ . Once the  $C_{dl}$  is obtained, the ECSA can be calculated according to equation (2):

$$ECSA = C_{dl} / C_s \quad (2)$$

Where the  $C_s$  is the specific capacitance of planar surface. In this work, a typical  $C_s$  value of  $0.040 \text{ mF cm}^{-2}$  for  $\text{MoS}_2$  material was adopted for the estimation of ECSA.<sup>11</sup>

The catalyst inks were prepared via the aforementioned procedures except the absence of carbon black. For the determination of  $C_{dl}$ , CV curves were measured in a potential range of  $0.57\sim 0.67 \text{ V}$  at scan rates of  $0.02, 0.04, 0.06, 0.08, 0.10, 0.12, 0.14, 0.16, 0.18,$  and  $0.20 \text{ V s}^{-2}$ . The CV curves of  $\text{MoS}_2@\text{CoS}_2$ ,  $\text{MoS}_2$  and  $\text{CoS}_2$  recorded at various scan rates are shown in Fig. S6. The anodic currents ( $i_a$ ) and cathodic currents ( $i_c$ ) at  $0.62 \text{ V}$  were extracted for further analysis.  $C_{dl}$  was then obtained by plotting  $i, 0.5(i_a - i_c)$ , as a function of scan rate, and the results were shown in Fig. 3c. The  $C_{dl}$  of  $\text{MoS}_2@\text{CoS}_2$ ,  $\text{MoS}_2$  and  $\text{CoS}_2$  are determined to be  $0.606, 6.383$  and  $0.015 \text{ mF}$ , respectively. Accordingly, the ECSA is calculated to be  $15.15 \text{ cm}^2$  for  $\text{MoS}_2@\text{CoS}_2$ ,  $159.58 \text{ cm}^2$  for  $\text{MoS}_2$ , and  $0.38 \text{ cm}^2$  for  $\text{CoS}_2$  when a  $C_s$  of  $0.040 \text{ mF}$  is considered.

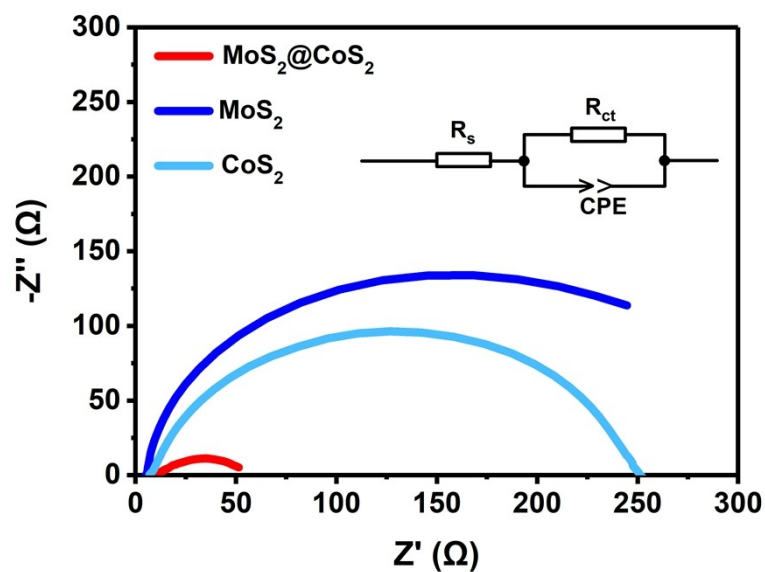

**Fig. S7** Nyquist plots of MoS<sub>2</sub>@CoS<sub>2</sub>, MoS<sub>2</sub> and CoS<sub>2</sub> recorded at a static overpotential of 200 mV.

The impedance behaviors can be depicted with the equivalent circuit model as displayed in inset of Fig. S7. According to the fitted results, the electrochemical charge transfer resistance ( $R_{ct}$ ) of MoS<sub>2</sub>@CoS<sub>2</sub>, MoS<sub>2</sub>, and CoS<sub>2</sub> in HER are determined to be 46, 319, and 242  $\Omega$ , respectively. The series resistance of the electrochemical cell is determined to be 5.4  $\Omega$  according to the real component value of the impedance at the minimum of the Nyquist plot.<sup>12</sup>

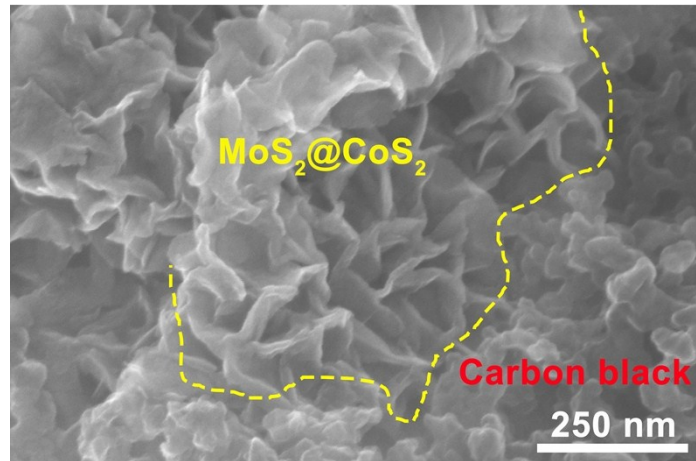

**Fig. S8** SEM image of MoS<sub>2</sub>@CoS<sub>2</sub> acquired after 1000 continuous CV cycles in a potential range of -0.15 ~ 0.1 V at a scan rate of 100 mV s<sup>-1</sup>.

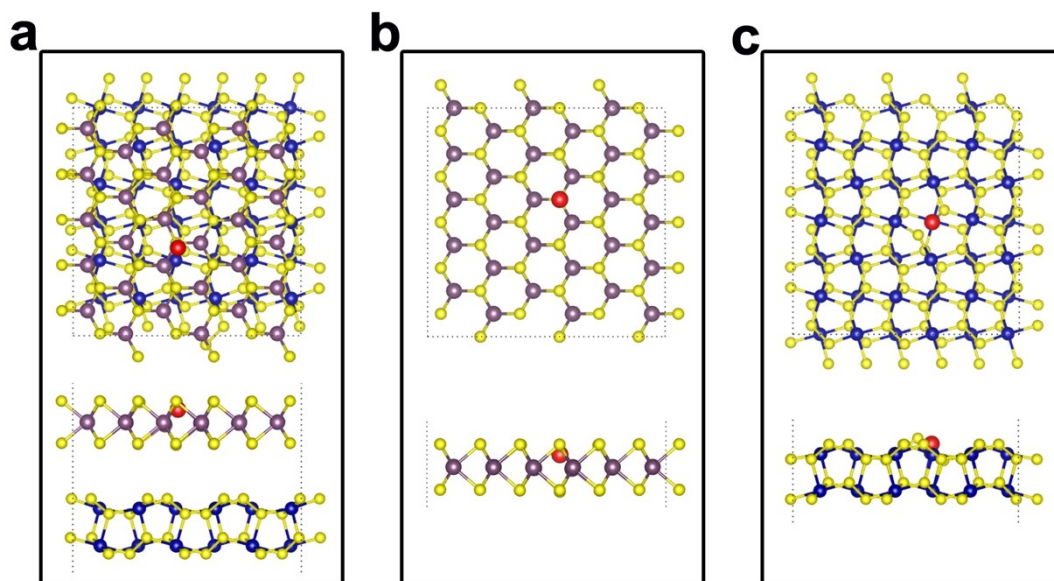

**Fig. S9** Top and side views of hydrogen adsorption configurations of (a) MoS<sub>2</sub>@CoS<sub>2</sub> heterojunction, (b) MoS<sub>2</sub> (S-vacancy), and (c) CoS<sub>2</sub> (001).

## Reference:

1. J. Ekspong, R. Sandström, L. P. Rajukumar, M. Terrones, T. Wågberg and E. Gracia-Espino, *Adv. Funct. Mater.*, 2018, **28**, 1802744.
2. X. Wu, S. Zhou, Z. Wang, J. Liu, W. Pei, P. Yang, J. Zhao and J. Qiu, *Adv. Energy Mater.*, 2019, **9**, 1901333.
3. H. Zhang, L. Yu, T. Chen, W. Zhou and X. W. Lou, *Adv. Funct. Mater.*, 2018, **28**, 1807086.
4. G. Kresse and J. Furthmüller, *Comput. Mater. Sci.*, 1996, **6**, 15-50.
5. G. Kresse and J. Furthmüller, *Phys. Rev. B*, 1996, **54**, 11169-11186.
6. J. K. Nørskov, T. Bligaard, A. Logadottir, J. Kitchin, J. G. Chen, S. Pandalov and U. Stimming, *J. Electrochem. Soc.*, 2005, **152**, J23-J26.
7. X. Huang, Z. Zeng and H. Zhang, *Chem. Soc. Rev.*, 2013, **42**, 1934-1946.
8. B. Dutta, Y. Wu, J. Chen, J. Wang, J. He, M. Sharafeldin, P. Kerns, L. Jin, A. M. Dongare, J. Rusling and S. L. Suib, *ACS Catal.*, 2019, **9**, 456-465.
9. H. Wang, X. Xiao, S. Liu, C. L. Chiang, X. Kuai, C. K. Peng, Y. C. Lin, X. Meng, J. Zhao, J. Choi, Y. G. Lin, J. M. Lee and L. Gao, *J. Am. Chem. Soc.*, 2019, **141**, 18578-18584.
10. C. C. L. McCrory, S. Jung, J. C. Peters and T. F. Jaramillo, *J. Am. Chem. Soc.*, 2013, **135**, 16977-16987.
11. C. Wang, B. Tian, M. Wu and J. Wang, *ACS Appl. Mater. Interfaces*, 2017, **9**, 7084-7090.
12. X. Tan, J. Shen, N. Semagina and M. Secanell, *J. Catal.*, 2019, **371**, 57-70.
